# Supplementary material for: The shape effect and its consequences for polar surfaces and for heterogeneous catalysis
Source: Royal Society of Chemistry journal article supplement (doi:10.1039/d3cp00996c), 2023-01-01
Supplement: d3cp00996c1.pdf [file d3cp00996c1.pdf]

# The shape effect and its consequences for polar surfaces and for heterogeneous catalysis

## Supplementary Information

Michael Springborg,<sup>1\*</sup> Meijuan Zhou,<sup>2</sup> Bernard Kirtman<sup>3</sup>

<sup>1</sup> Laboratory of Theoretical Chemistry, Department of Chemistry,  
Namur Institute of Structured Matter (NISM), University of Namur,  
Rue de Bruxelles 61, 5000 Namur, Belgium,

<sup>2</sup> SDU-ANU Joint Science College, Shandong University,  
Weihai 264209, People's Republic of China,

<sup>3</sup> Department of Chemistry and Biochemistry, University of California,  
Santa Barbara, California 93106, USA

\*To whom correspondence should be addressed; E-mail: michael.springborg@unamur.be.

### Contents

|                                                       |    |
|-------------------------------------------------------|----|
| <b>S1. The model for the isolated, finite crystal</b> | 2  |
| A. Crystal structure                                  | 2  |
| B. Shapes of the finite systems                       | 2  |
| C. Materials                                          | 2  |
| D. Results: PDOS                                      | 3  |
| <b>S2. Heterogeneous catalysis</b>                    | 15 |
| A. The parameters                                     | 15 |
| B. Results                                            | 17 |

## S1. THE MODEL FOR THE ISOLATED, FINITE CRYSTAL

All calculations for the large, finite, crystalline samples were done using a home-made Fortran77 program.

### A. Crystal structure

The crystal is defined through the three lattice vectors,

$$\begin{aligned}\vec{a} &= (3.0, 0.0, 0.0) \\ \vec{b} &= (0.0, 2.5, 0.0) \\ \vec{c} &= (0.0, 0.0, 3.0)\end{aligned}\tag{S1}$$

and the positions of the two atoms per unit cell,

$$\begin{aligned}\vec{r}_1 &= (0.0, 0.0, 0.0) \\ \vec{r}_2 &= (1.5, 0.0, 1.5).\end{aligned}\tag{S2}$$

### B. Shapes of the finite systems

In Tables S1, S2, and S3 we collect the values of the parameters that define the different shapes of the finite systems. In Table S4 we list the number of atoms in the different shapes both before and after stoichiometry has been enforced.

In all cases, the reference surface is

$$n_0 = 1.\tag{S3}$$

### C. Materials

The different materials have the same structure as given above but differ in the values of the model parameters. Larger values of  $|\epsilon_X - \epsilon_Y|$  relative to the hopping integrals  $t_{X,Y}^0$  result in more ionic systems. On the other hand, larger values of  $U_k$  suppress charge transfers.

#### D. Results: PDOS

Some relevant information may be found by looking at the atom-resolved partial density of states (PDOS). For the  $k$ th atom of the large, finite, crystalline system, we define its PDOS as

$$\text{PDOS}_k(\epsilon) = \sum_i |c_{ki}|^2 g(\epsilon - \epsilon_i). \quad (\text{S4})$$

Here,  $c_{ki}$  is the orbital expansion coefficient for the contribution of the  $k$ th atom-centered basis function to the  $i$ th orbital,  $\epsilon_i$  is the energy of that orbital, and  $g(\epsilon - \epsilon_i)$  is a broadening function for which we use

$$g(\epsilon - \epsilon_i) = \sqrt{\frac{\alpha}{\pi}} e^{-\alpha(\epsilon - \epsilon_i)^2} \quad (\text{S5})$$

where

$$\alpha = \frac{4 \ln 2}{(\text{FWHM})^2} \quad (\text{S6})$$

with the Full Width at Half Maximum (FWHM) being set equal to 0.06.

We present results for  $k$  being either the surface X atom at which the catalytic reaction takes place or an X atom in the center of the crystal (a bulk X atom). We also present the PDOS averaged over all atoms of the crystal, i.e., including atoms from all surfaces as well as the bulk. The results for the structures 1y – 8y, 21y – 28y, 12y, and 31y are shown in Figs. S1, S2, and S3. The structures 12y and 31y correspond to a non-polar surface. For such surfaces, no charge transfer is needed in order to stabilize the system and, accordingly, the X atoms tend to have a total charge similar to what is found in the inner part of the system. As the figures show, the PDOS for these surface atoms and for the bulk X atoms are very similar. The fact that the PDOS curves for the surface atoms of the different non-polar surfaces look quite similar can be understood as a consequence of the similar chemical surroundings for these atoms.

On the other hand, for the polar surfaces, i.e., the structures 1y – 8y and 21y – 28y, the PDOS for the corresponding surface and bulk atoms differ significantly. In 15 out of the 16 cases, the Fermi level passes through the PDOS curve for the polar surface X atom indicating that these atoms have a metallic behavior. Accordingly, for these atoms many orbitals are available for the catalytic reaction, suggesting that the model without Z is the more appropriate one.

A further observation can be made from the PDOS figures. Thus, the bulk atoms have a

vanishing PDOS at the Fermi level, indicating that the bulk part of the system is insulating / semiconducting. In contrast to this, with just a single exception most systems have a very small gap at the Fermi level, as can be seen in Table S6. This small gap is caused by orbitals localized to the surfaces.

| Shape | Surface | $a_i$ | $b_i$ | $c_i$ | $d_i$ | Shape | Surface | $a_i$ | $b_i$ | $c_i$ | $d_i$ |
|-------|---------|-------|-------|-------|-------|-------|---------|-------|-------|-------|-------|
| 1     | 1       | 0.0   | 0.0   | -1.0  | 20.0  | 5     | 1       | 0.0   | 0.0   | -1.0  | 20.0  |
|       | 2       | 0.0   | 0.0   | 1.0   | 25.0  |       | 2       | 0.0   | 0.0   | 1.0   | 30.0  |
|       | 3       | 0.0   | -1.0  | 0.0   | 18.0  |       | 3       | 0.0   | -1.0  | 0.0   | 18.0  |
|       | 4       | 0.0   | 1.0   | 0.0   | 18.0  |       | 4       | 0.0   | 2.0   | -1.0  | 18.0  |
|       | 5       | -1.0  | 0.0   | 0.0   | 23.0  |       | 5       | -2.0  | 0.0   | 1.0   | 30.0  |
|       | 6       | 1.0   | 0.0   | 0.0   | 21.0  |       | 6       | 2.0   | 0.0   | -1.0  | 46.0  |
| 2     | 1       | 0.0   | 0.0   | -1.0  | 20.0  | 6     | 1       | 0.0   | 0.0   | -1.0  | 20.0  |
|       | 2       | 0.0   | 1.0   | 1.0   | 25.0  |       | 2       | 0.0   | 0.0   | 1.0   | 30.0  |
|       | 3       | 0.0   | -1.0  | 0.0   | 18.0  |       | 3       | 0.0   | -1.0  | 0.0   | 18.0  |
|       | 4       | 0.0   | 1.0   | 0.0   | 18.0  |       | 4       | 0.0   | 2.0   | -1.0  | 20.0  |
|       | 5       | -1.0  | 0.0   | 0.0   | 23.0  |       | 5       | -1.0  | 0.0   | 0.0   | 23.0  |
|       | 6       | 1.0   | 0.0   | 0.0   | 21.0  |       | 6       | 1.0   | 0.0   | 0.0   | 21.0  |
| 3     | 1       | 0.0   | 0.0   | -1.0  | 20.0  | 7     | 1       | 0.0   | 0.0   | -1.0  | 20.0  |
|       | 2       | 0.0   | 0.0   | 1.0   | 24.0  |       | 2       | 0.0   | 0.0   | 1.0   | 30.0  |
|       | 3       | 0.0   | -1.0  | 0.0   | 18.0  |       | 3       | 0.0   | -1.0  | 0.0   | 18.0  |
|       | 4       | 0.0   | 1.0   | 0.0   | 18.0  |       | 4       | 0.0   | 1.0   | 1.0   | 24.0  |
|       | 5       | -2.0  | 0.0   | 1.0   | 25.0  |       | 5       | -2.0  | 0.0   | 1.0   | 25.0  |
|       | 6       | 1.0   | 0.0   | 0.0   | 23.0  |       | 6       | 1.0   | 0.0   | 0.0   | 21.0  |
| 4     | 1       | 0.0   | 0.0   | -1.0  | 20.0  | 8     | 1       | 0.0   | 0.0   | -1.0  | 20.0  |
|       | 2       | 0.0   | 0.0   | 1.0   | 30.0  |       | 2       | 0.0   | 0.0   | 1.0   | 30.0  |
|       | 3       | 0.0   | -1.0  | 0.0   | 18.0  |       | 3       | 0.0   | -1.0  | 0.0   | 18.0  |
|       | 4       | 0.0   | 1.0   | 0.0   | 18.0  |       | 4       | 0.0   | 1.0   | 1.0   | 23.0  |
|       | 5       | -2.0  | 0.0   | 1.0   | 25.0  |       | 5       | -1.0  | 0.0   | 0.0   | 25.0  |
|       | 6       | 2.0   | 0.0   | -1.0  | 56.0  |       | 6       | 2.0   | 0.0   | -1.0  | 23.0  |

TABLE S1: The values defining the surfaces for the shapes 1 – 8 of the present study.

| Shape | Surface | $a_i$ | $b_i$ | $c_i$ | $d_i$ | Shape | Surface | $a_i$ | $b_i$ | $c_i$ | $d_i$ |
|-------|---------|-------|-------|-------|-------|-------|---------|-------|-------|-------|-------|
| 11    | 1       | 0.0   | 0.0   | -1.0  | 18.0  | 15    | 1       | 0.0   | 0.0   | -1.0  | 20.0  |
|       | 2       | 0.0   | 0.0   | 1.0   | 18.0  |       | 2       | 0.0   | 0.0   | 1.0   | 30.0  |
|       | 3       | 0.0   | -1.0  | 0.0   | 20.0  |       | 3       | 0.0   | -1.0  | 0.0   | 18.0  |
|       | 4       | 0.0   | 1.0   | 0.0   | 20.0  |       | 4       | 0.0   | 2.0   | -1.0  | 18.0  |
|       | 5       | -1.0  | 0.0   | 0.0   | 23.0  |       | 5       | -2.0  | 0.0   | 1.0   | 30.0  |
|       | 6       | 1.0   | 0.0   | 0.0   | 21.0  |       | 6       | 2.0   | 0.0   | -1.0  | 46.0  |
| 12    | 1       | 0.0   | 0.0   | -1.0  | 20.0  | 16    | 1       | 0.0   | 0.0   | -1.0  | 20.0  |
|       | 2       | 0.0   | 1.0   | 1.0   | 25.0  |       | 2       | 0.0   | 0.0   | 1.0   | 30.0  |
|       | 3       | 0.0   | -1.0  | 0.0   | 18.0  |       | 3       | 0.0   | -1.0  | 0.0   | 18.0  |
|       | 4       | 0.0   | 1.0   | 0.0   | 18.0  |       | 4       | 0.0   | 2.0   | -1.0  | 20.0  |
|       | 5       | -1.0  | 0.0   | 0.0   | 23.0  |       | 5       | -1.0  | 0.0   | 0.0   | 23.0  |
|       | 6       | 1.0   | 0.0   | 0.0   | 21.0  |       | 6       | 1.0   | 0.0   | 0.0   | 21.0  |
| 13    | 1       | 0.0   | 0.0   | -1.0  | 20.0  | 17    | 1       | 0.0   | 0.0   | -1.0  | 20.0  |
|       | 2       | 0.0   | 0.0   | 1.0   | 24.0  |       | 2       | 0.0   | 0.0   | 1.0   | 30.0  |
|       | 3       | 0.0   | -1.0  | 0.0   | 18.0  |       | 3       | 0.0   | -1.0  | 0.0   | 18.0  |
|       | 4       | 0.0   | 1.0   | 0.0   | 18.0  |       | 4       | 0.0   | 1.0   | 1.0   | 24.0  |
|       | 5       | -2.0  | 0.0   | 1.0   | 25.0  |       | 5       | -2.0  | 0.0   | 1.0   | 25.0  |
|       | 6       | 1.0   | 0.0   | 0.0   | 23.0  |       | 6       | 1.0   | 0.0   | 0.0   | 21.0  |
| 14    | 1       | 0.0   | 0.0   | -1.0  | 18.0  | 18    | 1       | 0.0   | 0.0   | -1.0  | 20.0  |
|       | 2       | 0.0   | 0.0   | 1.0   | 18.0  |       | 2       | 0.0   | 0.0   | 1.0   | 30.0  |
|       | 3       | 0.0   | -1.0  | 0.0   | 20.0  |       | 3       | 0.0   | -1.0  | 0.0   | 18.0  |
|       | 4       | 0.0   | 1.0   | 0.0   | 20.0  |       | 4       | 0.0   | 1.0   | 1.0   | 23.0  |
|       | 5       | -2.0  | 0.0   | 1.0   | 25.0  |       | 5       | -1.0  | 0.0   | 0.0   | 25.0  |
|       | 6       | 2.0   | 0.0   | -1.0  | 56.0  |       | 6       | 2.0   | 0.0   | -1.0  | 23.0  |

TABLE S2: The values defining the surfaces for the shapes 11 – 18 of the present study.

| Shape | Surface | $a_i$   | $b_i$   | $c_i$   | $d_i$    | Shape | Surface | $a_i$   | $b_i$   | $c_i$   | $d_i$    |
|-------|---------|---------|---------|---------|----------|-------|---------|---------|---------|---------|----------|
| 21    | 1       | -0.0    | -0.0    | -3808.0 | 121856.0 | 31    | 1       | -0.0    | -0.0    | -4352.0 | 121856.0 |
|       | 2       | -3584.0 | 2176.0  | 952.0   | 34048.0  |       | 2       | -3584.0 | 1904.0  | 1088.0  | 34048.0  |
|       | 3       | 3584.0  | 2176.0  | 952.0   | 26880.0  |       | 3       | 3584.0  | 1904.0  | 1088.0  | 26880.0  |
|       | 4       | 0.0     | -4352.0 | 1904.0  | 60928.0  |       | 4       | 0.0     | -3808.0 | 2176.0  | 60928.0  |
| 22    | 1       | -0.0    | -0.0    | -3808.0 | 121856.0 | 32    | 1       | -0.0    | -0.0    | -4352.0 | 121856.0 |
|       | 2       | -3584.0 | 2176.0  | 1904.0  | 3584.0   |       | 2       | -3584.0 | 1904.0  | 2176.0  | 3584.0   |
|       | 3       | 3584.0  | 2176.0  | 1904.0  | -3584.0  |       | 3       | 3584.0  | 1904.0  | 2176.0  | -3584.0  |
|       | 4       | 0.0     | -4352.0 | -0.0    | 121856.0 |       | 4       | 0.0     | -3808.0 | -0.0    | 121856.0 |
| 23    | 1       | -0.0    | -0.0    | -3808.0 | 121856.0 | 33    | 1       | -0.0    | -0.0    | -4352.0 | 121856.0 |
|       | 2       | -3584.0 | 2176.0  | -0.0    | 64512.0  |       | 2       | -3584.0 | 1904.0  | -0.0    | 64512.0  |
|       | 3       | 3584.0  | 2176.0  | 0.0     | 57344.0  |       | 3       | 3584.0  | 1904.0  | 0.0     | 57344.0  |
|       | 4       | 0.0     | -4352.0 | 3808.0  | 0.0      |       | 4       | 0.0     | -3808.0 | 4352.0  | 0.0      |
| 24    | 1       | -0.0    | -0.0    | -3808.0 | 121856.0 | 34    | 1       | -0.0    | -0.0    | -4352.0 | 121856.0 |
|       | 2       | -3584.0 | 2176.0  | 2244.0  | -7296.0  |       | 2       | -3584.0 | 1904.0  | 2176.0  | 3584.0   |
|       | 3       | 3584.0  | 2176.0  | 2244.0  | -14464.0 |       | 3       | 3584.0  | 1904.0  | 2176.0  | -3584.0  |
|       | 4       | 0.0     | -4352.0 | -680.0  | 143616.0 |       | 4       | 0.0     | -3808.0 | -0.0    | 121856.0 |
| 25    | 1       | -0.0    | -0.0    | -3808.0 | 121856.0 | 35    | 1       | -0.0    | -0.0    | -4352.0 | 121856.0 |
|       | 2       | -3584.0 | 2176.0  | -340.0  | 75392.0  |       | 2       | -3584.0 | 1904.0  | -0.0    | 64512.0  |
|       | 3       | 3584.0  | 2176.0  | -340.0  | 68224.0  |       | 3       | 3584.0  | 1904.0  | 0.0     | 57344.0  |
|       | 4       | 0.0     | -4352.0 | 4488.0  | -21760.0 |       | 4       | 0.0     | -3808.0 | 4352.0  | 0.0      |
| 26    | 1       | -0.0    | -0.0    | -3808.0 | 121856.0 | 36    | 1       | -0.0    | -0.0    | -4352.0 | 121856.0 |
|       | 2       | -3584.0 | 2176.0  | 2856.0  | -26880.0 |       | 2       | -3584.0 | 1904.0  | 3264.0  | -26880.0 |
|       | 3       | 3584.0  | 2176.0  | -952.0  | 87808.0  |       | 3       | 3584.0  | 1904.0  | -1088.0 | 87808.0  |
|       | 4       | 0.0     | -4352.0 | 1904.0  | 60928.0  |       | 4       | 0.0     | -3808.0 | 2176.0  | 60928.0  |
| 27    | 1       | -0.0    | -0.0    | -3808.0 | 121856.0 | 37    | 1       | -0.0    | -0.0    | -4352.0 | 121856.0 |
|       | 2       | -3584.0 | 2176.0  | -952.0  | 94976.0  |       | 2       | -3584.0 | 1904.0  | -1088.0 | 94976.0  |
|       | 3       | 3584.0  | 2176.0  | 2856.0  | -34048.0 |       | 3       | 3584.0  | 1904.0  | 3264.0  | -34048.0 |
|       | 4       | 0.0     | -4352.0 | 1904.0  | 60928.0  |       | 4       | 0.0     | -3808.0 | 2176.0  | 60928.0  |
| 28    | 1       | -0.0    | -0.0    | -3808.0 | 121856.0 | 38    | 1       | -0.0    | -0.0    | -7052.0 | 197456.0 |
|       | 2       | -2128.0 | 1292.0  | -952.0  | 68768.0  |       | 2       | -2788.0 | 1462.0  | -1763.0 | 112094.0 |
|       | 3       | 2128.0  | 1292.0  | 2856.0  | -57344.0 |       | 3       | 2788.0  | 1462.0  | 5289.0  | -90938.0 |
|       | 4       | 0.0     | -2584.0 | 1904.0  | 11424.0  |       | 4       | 0.0     | -2924.0 | 3526.0  | 21156.0  |

TABLE S3: The values defining the surfaces for the shapes 21 – 28 and 31 – 38 of the present study.

| Shape | $N_{Y,\text{initial}}$ | $N_{X,\text{initial}}$ | $N_{Y,\text{final}}$ | $N_{X,\text{final}}$ | Shape | $N_{Y,\text{initial}}$ | $N_{X,\text{initial}}$ | $N_{Y,\text{final}}$ | $N_{X,\text{final}}$ |
|-------|------------------------|------------------------|----------------------|----------------------|-------|------------------------|------------------------|----------------------|----------------------|
| 1     | 3375                   | 3375                   | 3375                 | 3375                 | 21    | 1165                   | 1186                   | 1165                 | 1165                 |
| 2     | 3360                   | 3465                   | 3360                 | 3360                 | 22    | 1828                   | 1967                   | 1828                 | 1928                 |
| 3     | 2535                   | 2640                   | 2535                 | 2535                 | 23    | 1752                   | 1824                   | 1752                 | 1752                 |
| 4     | 3450                   | 3435                   | 3435                 | 3435                 | 24    | 1761                   | 1890                   | 1761                 | 1761                 |
| 5     | 2743                   | 2544                   | 2544                 | 2544                 | 25    | 1770                   | 1883                   | 1770                 | 1770                 |
| 6     | 3270                   | 3165                   | 3165                 | 3165                 | 26    | 1761                   | 1900                   | 1761                 | 1761                 |
| 7     | 2946                   | 2927                   | 2927                 | 2927                 | 27    | 1763                   | 1902                   | 1763                 | 1763                 |
| 8     | 2997                   | 3010                   | 2997                 | 2997                 | 28    | 1814                   | 1918                   | 1814                 | 1814                 |
| 11    | 2925                   | 3150                   | 2925                 | 2925                 | 31    | 1884                   | 1888                   | 1884                 | 1884                 |
| 12    | 3630                   | 3345                   | 3345                 | 3345                 | 32    | 1828                   | 1967                   | 1828                 | 1828                 |
| 13    | 2691                   | 2592                   | 2592                 | 2592                 | 33    | 1880                   | 1891                   | 1880                 | 1880                 |
| 14    | 2652                   | 2842                   | 2652                 | 2652                 | 34    | 1828                   | 1967                   | 1828                 | 1828                 |
| 15    | 2781                   | 2643                   | 2643                 | 2643                 | 35    | 1880                   | 1891                   | 1880                 | 1880                 |
| 16    | 3375                   | 3210                   | 3210                 | 3210                 | 36    | 1881                   | 1884                   | 1881                 | 1881                 |
| 17    | 3220                   | 2980                   | 2980                 | 2980                 | 37    | 1886                   | 1891                   | 1886                 | 1886                 |
| 18    | 3214                   | 2965                   | 2965                 | 2965                 | 38    | 1165                   | 1186                   | 1165                 | 1165                 |

TABLE S4: The number of Y and X atoms both before and after stoichiometry has been enforced.



| Parameter    | w    | x    | y    | z    |
|--------------|------|------|------|------|
| $\epsilon_X$ | -2.0 | -2.0 | -2.0 | -2.0 |
| $\epsilon_Y$ | -3.5 | -5.5 | -6.5 | -6.5 |
| $U_X$        | 2.0  | 2.0  | 1.0  | 1.0  |
| $U_Y$        | 2.0  | 2.0  | 1.0  | 1.0  |
| $t_{XX}^0$   | -0.6 | -0.6 | -0.6 | -0.6 |
| $t_{XY}^0$   | -0.8 | -0.8 | -0.8 | -0.8 |
| $t_{YY}^0$   | -0.5 | -0.5 | -0.5 | -0.5 |
| $f_v$        | 0.5  | 0.5  | 0.5  | 1.0  |
| $r_c$        | 2.5  | 2.5  | 2.5  | 2.5  |
| $r_0$        | 2.5  | 2.5  | 2.5  | 2.5  |

TABLE S5: The parameter values for the four different materials.

| System | Gap    | System | Gap    | System | Gap    | System | Gap    |
|--------|--------|--------|--------|--------|--------|--------|--------|
| 1y     | 0.0011 | 21y    | 0.0004 | 11y    | 0.0020 | 31y    | 1.3815 |
| 2y     | 0.0014 | 22y    | 0.0004 | 12y    | 0.0001 | 32y    | 0.0004 |
| 3y     | 0.0005 | 23y    | 0.0009 | 13y    | 0.0002 | 33y    | 0.0009 |
| 4y     | 0.0038 | 24y    | 0.0008 | 14y    | 0.0002 | 34y    | 0.0004 |
| 5y     | 0.0038 | 25y    | 0.0016 | 15y    | 0.0014 | 35y    | 0.0009 |
| 6y     | 0.0039 | 26y    | 0.0008 | 16y    | 0.0029 | 36y    | 1.5111 |
| 7y     | 0.0013 | 27y    | 0.0010 | 17y    | 0.0026 | 37y    | 0.6539 |
| 8y     | 0.0006 | 28y    | 0.0014 | 18y    | 0.0014 | 38y    | 0.0039 |
| 1w     | 0.0002 | 21w    | 0.0003 | 11w    | 0.0002 | 31w    | 0.0005 |
| 2w     | 0.0004 | 22w    | 0.0001 | 12w    | 0.0001 | 32w    | 0.0003 |
| 3w     | 0.0002 | 23w    | 0.0001 | 13w    | 0.0007 | 33w    | 0.0003 |
| 4w     | 0.0001 | 24w    | 0.0005 | 14w    | 0.0001 | 34w    | 0.0003 |
| 5w     | 0.0003 | 25w    | 0.0002 | 15w    | 0.0005 | 35w    | 0.0003 |
| 6w     | 0.0002 | 26w    | 0.0004 | 16w    | 0.0004 | 36w    | 0.0001 |
| 7w     | 0.0003 | 27w    | 0.0004 | 17w    | 0.0004 | 37w    | 0.0007 |
| 8w     | 0.0002 | 28w    | 0.0001 | 18w    | 0.0002 | 38w    | 0.0002 |
| 1z     | 0.0017 | 21z    | 0.0024 | 11z    | 0.0003 | 31z    | 0.9529 |
| 2z     | 0.0015 | 22z    | 0.0004 | 12z    | 0.0012 | 32z    | 0.0003 |
| 3z     | 0.0015 | 23z    | 0.0003 | 13z    | 0.0003 | 33z    | 0.0024 |
| 4z     | 0.0012 | 24z    | 0.0009 | 14z    | 0.0022 | 34z    | 0.0003 |
| 5z     | 0.0036 | 25z    | 0.0010 | 15z    | 0.0003 | 35z    | 0.0024 |
| 6z     | 0.0018 | 26z    | 0.0019 | 16z    | 0.0006 | 36z    | 1.1938 |
| 7z     | 0.0009 | 27z    | 0.0006 | 17z    | 0.0007 | 37z    | 0.0175 |
| 8z     | 0.0002 | 28z    | 0.0010 | 18z    | 0.0017 | 38z    | 0.0075 |
|        |        | 21x    | 0.0008 |        |        | 31x    | 0.0053 |
|        |        | 22x    | 0.0004 |        |        | 32x    | 0.0004 |
|        |        | 23x    | 0.0026 |        |        | 33x    | 0.0005 |
|        |        | 24x    | 0.0004 |        |        | 34x    | 0.0004 |
|        |        | 25x    | 0.0003 |        |        | 35x    | 0.0005 |
|        |        | 26x    | 0.0002 |        |        | 36x    | 0.0108 |
|        |        | 27x    | 0.0005 |        |        | 37x    | 0.0031 |
|        |        | 28x    | 0.0008 |        |        | 38x    | 0.0014 |

TABLE S6: The HOMO-LUMO gap for the large finite crystalline systems.

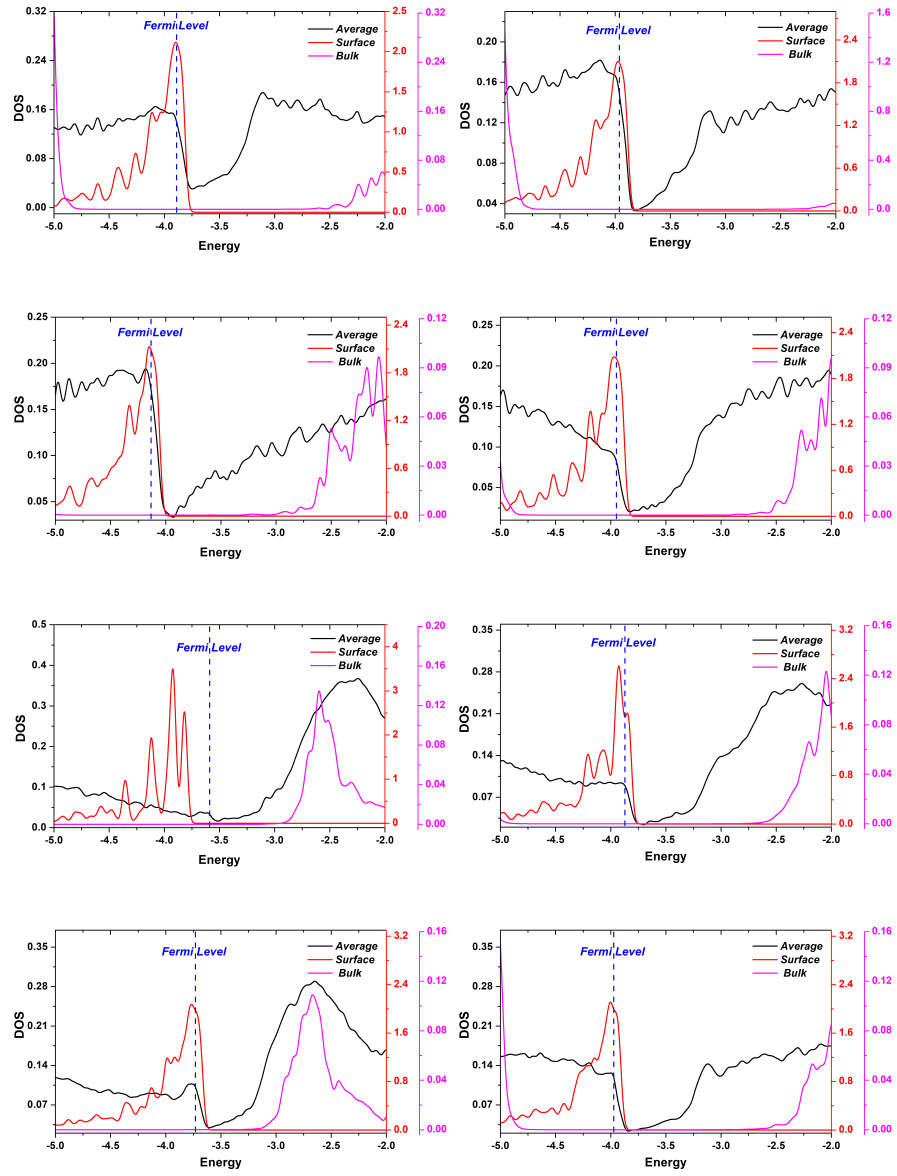

FIG. S1: PDOS curves for the structures 1y – 8y. The top left panel shows the PDOS for 1y, the top right one that for 2y, etc.

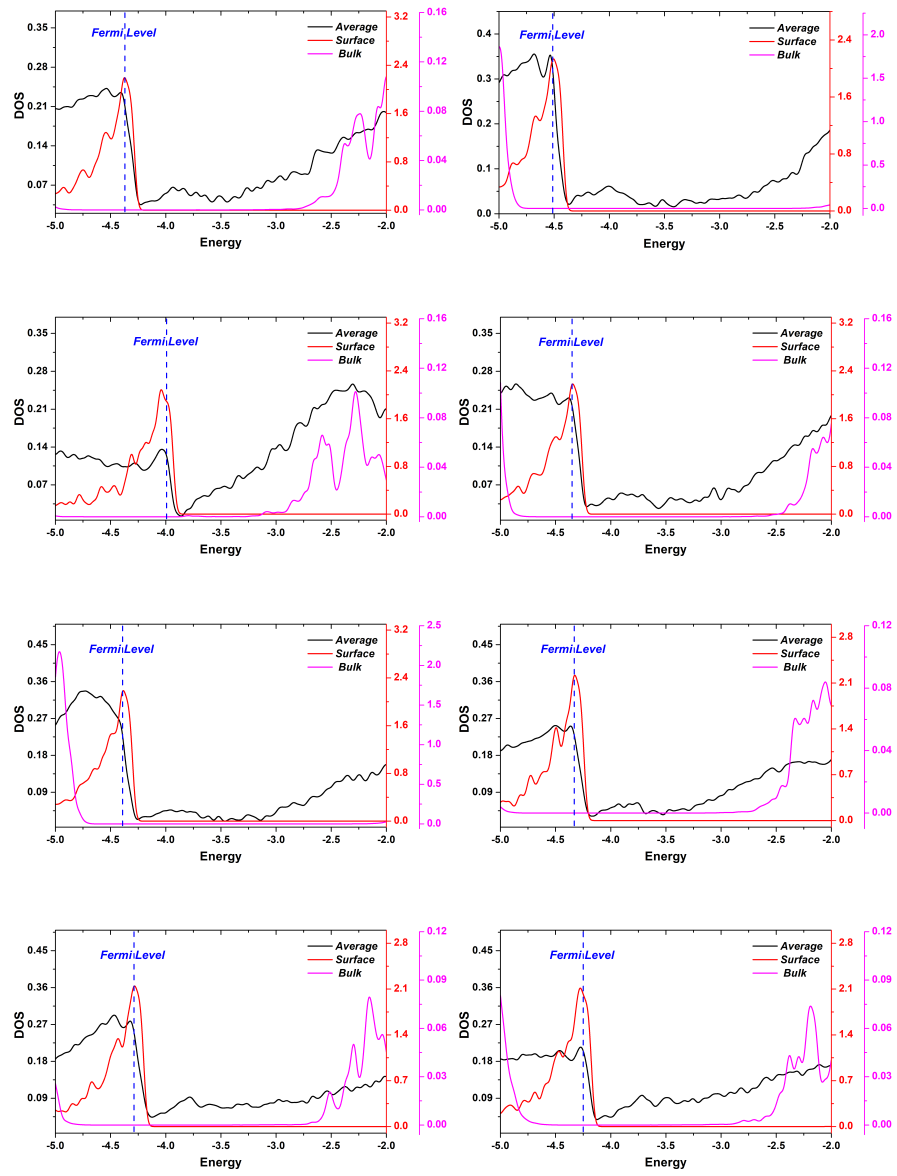

FIG. S2: As Fig. S1 but for the structures 21y – 28y.

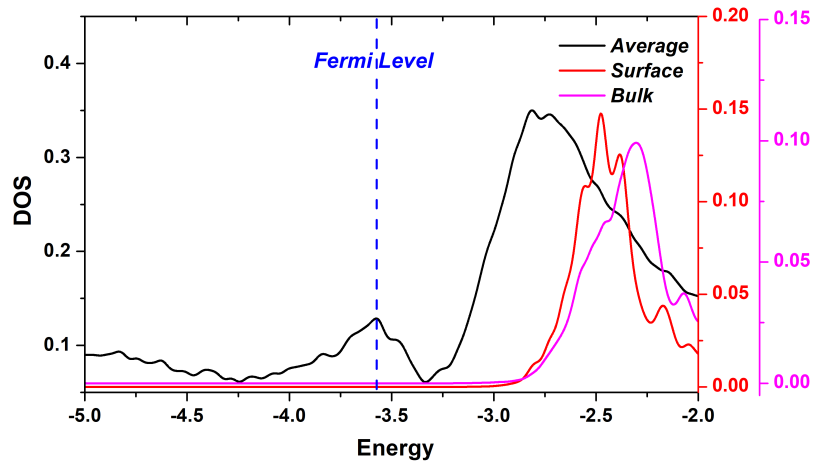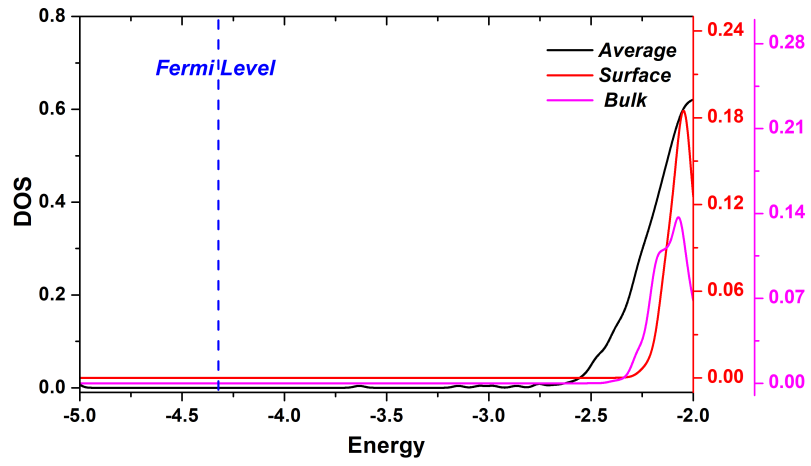

FIG. S3: PDOS curves for the structures (from top to bottom) 12y and 31y.

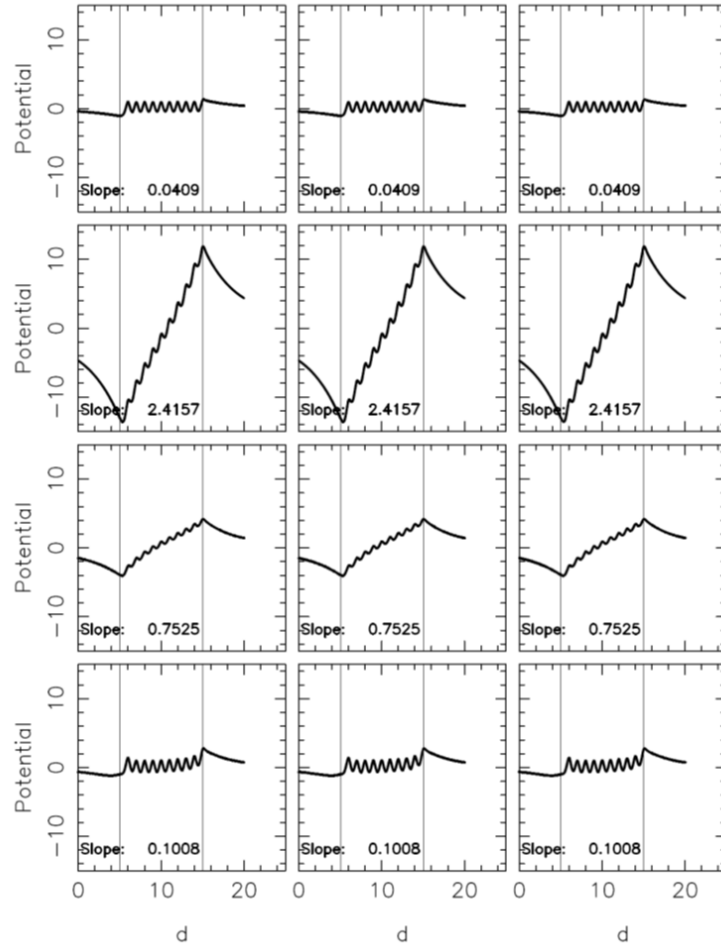

FIG. S4: The potential along three different lines passing through a small crystal. The vertical bars mark the boundaries of the crystal, and the three columns show the potential along the  $x$ ,  $y$ , and  $z$  direction, respectively. The crystal has a CsCl-like structure with the lattice vectors along the  $x$ ,  $y$ , and  $z$  directions. The four rows show the potential for different cases: Referring to Eq. (4) of the main text, in the top,  $\hat{H}_{lr}$  and  $\hat{H}_{sr}$  are both included; in the second row, none of those is included; in the third row,  $\hat{H}_{sr}$  is included; in the lowest row,  $\hat{H}_{lr}$  is included. Also given is the slope of a linear function fitting the curves. The oscillations are due to the atomic structure.

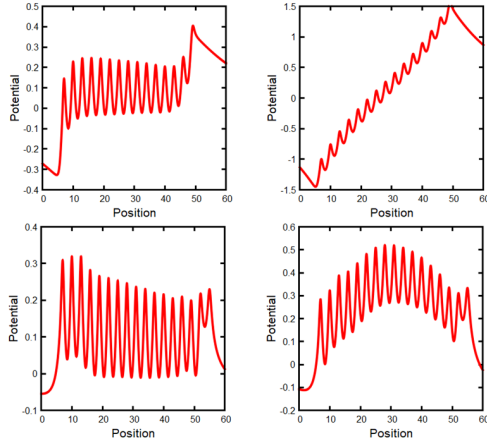

FIG. S5: The potential along one line passing through a small crystal from (at the left in each panel) slightly outside the common surface for all shapes and (at the right) to slightly outside the opposite surface. The results are for material w and for (top) shape 1 and (bottom) shape 5. In the right panels, all atomic charges have been set identical to the values of the central region. The oscillations are due to the atomic structure.

## S2. HETEROGENEOUS CATALYSIS

Our goal in this section is to study the catalytic effect of shape on a representative heterogeneous reaction.

### A. The parameters

All calculations related to heterogeneous catalysis were done using a home-made Fortran77 program. Fig. S6 contains an example of the relevant part of the input that was used, where the corresponding model system is given the name R1-y, meaning reaction 1 on catalyst y. The different reactions are defined through the values of the parameters of the Hamiltonian.

We now describe the input briefly. The three namelists, `inp3`, `inp4`, and `inp5`, contain parameter values which we split into those that describe solely the properties of the interacting species and those that specify the properties of the catalyst. We start with the parameters for the reacting species A,B,C:

- `epsa`, `epsb`, and `epsc`: on-site energies  $\epsilon_A$ ,  $\epsilon_B$ , and  $\epsilon_C$ .

- **tab0**, **tbc0**, **alab**, and **albc**: parameters for the nearest-neighbor hopping integrals  $t_{pq}$ , i.e.,  $t_{AB,0}$ ,  $t_{BC,0}$ ,  $\alpha_{AB}$ , and  $\alpha_{BC}$ .
- **dab0** and **dbc0**: The equilibrium bond lengths,  $d_{AB,0}$  and  $d_{BC,0}$ , for the isolated AB and BC molecules, respectively.
- **beab** and **becb**: The parameters  $\beta_{AB}$  and  $\beta_{BC}$  for the repulsive potential.
- **nrepcase**: A parameter that describes whether an exponential (**nrepcase** = 1) or a power (**nrepcase** = 2) is used for the repulsive potential. Notice that the same type of dependence is used for all repulsive potentials as well as those describing the interactions with the catalyst.
- **vac** and **beac**: The parameters  $v_{AC}$  and  $\beta_{AC}$  for the next-nearest-neighbor repulsive potentials.
- Values for parameters  $v_{AB}$  and  $v_{BC}$  are calculated from the other parameter values.

Next, the parameters describing the properties of the catalyst are:

- **epsx**: The on-site energy  $\epsilon_X$ .
- **txa0**, **alxa**, **bexa**, and **dxa0**: Parameters for the nearest-neighbor X-A interactions, i.e.,  $t_{XA,0}$ ,  $\alpha_{XA}$ , and  $\beta_{XA}$ , as well as the equilibrium bond length for the isolated XA molecule. From these parameters  $v_{XA}$  is calculated.
- **vxb**, **vxc**, **bexb**, and **bexc**: Parameter values  $v_{XB}$ ,  $v_{XC}$ ,  $\beta_{XB}$ , and  $\beta_{XC}$  for the second- and third-nearest-neighbor repulsive potentials.
- **qx**: This is the atomic charge of the X atom that is employed when we do not use the charge of the selected surface atom for a given shape and surface within the no-Z model. Usually, we will set **qx** equal to the atomic charge of an X atom from the bulk of the crystal. By using this value for the atomic charge of X for all shapes, the effects of the variations in this charge on the catalytic properties can be studied.

For the repulsive potential, we also introduce

$$d_{AC,0} = d_{AB,0} + d_{BC,0}$$



$$\begin{aligned}
d_{\text{XB},0} &= d_{\text{XA},0} + d_{\text{AB},0} \\
d_{\text{XC},0} &= d_{\text{XA},0} + d_{\text{AB},0} + d_{\text{BC},0}.
\end{aligned}
\tag{S7}$$

## B. Results

We report the following quantities:

- $E_{a,1}$ : The activation energy for the reaction  $\text{X-AB} + \text{C} \rightarrow \text{X-A-B-C} \rightarrow \text{X-A} + \text{BC}$ , i.e.,  $E_{\text{tot}}(\text{X-A-B-C}) - E_{\text{tot}}(\text{X-AB}) - E_{\text{tot}}(\text{C})$ .
- $E_{a,2}$ : The activation energy for the reaction  $\text{X-A} + \text{BC} \rightarrow \text{X-A-B-C} \rightarrow \text{X-AB} + \text{C}$ , i.e.,  $E_{\text{tot}}(\text{X-A-B-C}) - E_{\text{tot}}(\text{X-A}) - E_{\text{tot}}(\text{BC})$ .
- $V_{\text{X}}$ : The long-range potential at the site of the X atom where the reaction takes place.
- $q_{0\text{X}}$ : The atomic charge of the X atom (no-Z model) where the reaction takes place before the reacting species have approached the surface.

Figs. S7 and S8 show the input files for the calculations using the catalyst y but for different shapes. In Tables S7 and S8 we list the resulting activation energies  $E_{a1}$  and  $E_{a2}$ .

As shown in Figs. S9 and S10, the activation energy shows a largely smooth dependence on the atomic charge of surface atom X prior to reaction.

Finally, we considered the other catalyst materials, i.e., the models x, z and w. For these materials only polar surface reaction 6 was examined. The input files are reproduced in Fig. S11 and the results summarized in Table S9. The activation energies as a function of the initial atomic charges of the surface X atom are shown in Fig. S12.

Fig. S13 shows how the charge on the X atom of one material varies with the charge on the X atom for another catalytic material when the shape is the same: different catalysts of different materials possess the same shape-dependence for the atomic charges on X and, consequently, the same shape-dependence for their catalytic performance.

---

```

&inp3 epsx=-5.5, epsa=-3.0, epsb=-3.2, epsc=-3.0,
txa0=3.0, tab0=5.0, tbc0=5.0, alxa=0.4, alab=0.5, albc=0.5,
dxa0=2.0, dab0=2.1, dbc0=2.1, bexa=4.5, beab=1.5, bebc=1.5,
nrepcase=2, &end
&inp4 qx=-0.86678, &end
&inp5 vac=0.4, vxb=0.0, vxc=0.0, beac=3.0, bexb=1.0, bexc=1.0, &end

```

---

FIG. S6: The relevant part of the input file for the catalytic reaction of model R1-y.

---

```

&inp3 epsx=-5.5, epsa=-3.0, epsb=-3.2, epsc=-3.05,
txa0=3.0, tab0=5.0, tbc0=5.1, alxa=0.4, alab=0.5, albc=0.5,
dxa0=2.0, dab0=2.1, dbc0=2.05, bexa=4.5, beab=1.5, bebc=1.5,
nrepcase=2, &end
&inp4 qx=-0.86678, &end
&inp5 vac=0.4, vxb=0.0, vxc=0.0, beac=3.0, bexb=1.0, bexc=1.0, &end
-----
&inp3 epsx=-5.5, epsa=-3.0, epsb=-3.2, epsc=-3.05,
txa0=3.0, tab0=5.0, tbc0=5.1, alxa=0.4, alab=0.5, albc=0.52,
dxa0=2.0, dab0=2.1, dbc0=2.15, bexa=4.5, beab=1.5, bebc=1.52,
nrepcase=2, &end
&inp4 qx=-0.86678, &end
&inp5 vac=0.4, vxb=0.0, vxc=0.0, beac=3.0, bexb=1.0, bexc=1.0, &end
-----
&inp3 epsx=-5.5, epsa=-3.0, epsb=-3.2, epsc=-3.05,
txa0=3.0, tab0=5.0, tbc0=5.1, alxa=0.4, alab=0.45, albc=0.5,
dxa0=2.0, dab0=2.1, dbc0=2.15, bexa=4.5, beab=1.5, bebc=1.52,
nrepcase=2, &end
&inp4 qx=-0.86678, &end
&inp5 vac=0.4, vxb=0.0, vxc=0.0, beac=3.0, bexb=1.0, bexc=1.0, &end
-----
&inp3 epsx=-5.5, epsa=-2.8, epsb=-3.2, epsc=-2.90,
txa0=3.0, tab0=5.0, tbc0=5.1, alxa=0.4, alab=0.45, albc=0.5,
dxa0=2.0, dab0=2.1, dbc0=2.15, bexa=4.5, beab=1.5, bebc=1.52,
nrepcase=2, &end
&inp4 qx=-0.86678, &end
&inp5 vac=0.4, vxb=0.0, vxc=0.0, beac=3.0, bexb=1.0, bexc=1.0, &end
-----
&inp3 epsx=-5.5, epsa=-2.8, epsb=-3.2, epsc=-2.60,
txa0=3.0, tab0=5.0, tbc0=5.1, alxa=0.4, alab=0.45, albc=0.5,
dxa0=2.0, dab0=2.1, dbc0=2.15, bexa=4.5, beab=1.5, bebc=1.52,
nrepcase=2, &end
&inp4 qx=-0.86678, &end
&inp5 vac=0.4, vxb=0.0, vxc=0.0, beac=3.0, bexb=1.0, bexc=1.0, &end

```

---

FIG. S7: Input files for the catalytic reaction of the models (from top) R2-y, R3-y, R4-y, R5-y, and R6-y. The different models are separated by horizontal lines.

---

```

&inp3 epsx=-4.5, epsa=-2.8, epsb=-3.2, epsc=-2.60,
txa0=3.0, tab0=5.0, tbc0=5.1, alxa=0.4, alab=0.45, albc=0.5,
dxa0=2.0, dab0=2.1, dbc0=2.15, bexa=4.5, beab=1.5, bebc=1.52,
nrepcase=2, &end
&inp4 qx=-0.86678, &end
&inp5 vac=0.4, vxb=0.0, vxc=0.0, beac=3.0, bexb=1.0, bexc=1.0, &end
-----
&inp3 epsx=-3.5, epsa=-2.8, epsb=-3.2, epsc=-2.60,
txa0=3.0, tab0=5.0, tbc0=5.1, alxa=0.4, alab=0.45, albc=0.5,
dxa0=2.0, dab0=2.1, dbc0=2.15, bexa=4.5, beab=1.5, bebc=1.52,
nrepcase=2, &end
&inp4 qx=-0.86678, &end
&inp5 vac=0.4, vxb=0.0, vxc=0.0, beac=3.0, bexb=1.0, bexc=1.0, &end
-----
&inp3 epsx=-3.0, epsa=-2.8, epsb=-3.2, epsc=-2.60,
txa0=3.0, tab0=5.0, tbc0=5.1, alxa=0.4, alab=0.45, albc=0.5,
dxa0=2.0, dab0=2.1, dbc0=2.15, bexa=4.5, beab=1.5, bebc=1.52,
nrepcase=2, &end
&inp4 qx=-0.86678, &end
&inp5 vac=0.4, vxb=0.0, vxc=0.0, beac=3.0, bexb=1.0, bexc=1.0, &end
-----
&inp3 epsx=-4.5, epsa=-2.8, epsb=-3.2, epsc=-2.60,
txa0=1.5, tab0=5.0, tbc0=5.1, alxa=0.4, alab=0.45, albc=0.5,
dxa0=2.0, dab0=2.1, dbc0=2.15, bexa=4.5, beab=1.5, bebc=1.52,
nrepcase=2, &end
&inp4 qx=-0.86678, &end
&inp5 vac=0.4, vxb=0.0, vxc=0.0, beac=3.0, bexb=1.0, bexc=1.0, &end
-----
&inp3 epsx=-4.5, epsa=-2.8, epsb=-3.2, epsc=-2.60,
txa0=3.5, tab0=5.0, tbc0=5.1, alxa=0.4, alab=0.45, albc=0.5,
dxa0=2.0, dab0=2.1, dbc0=2.15, bexa=4.5, beab=1.5, bebc=1.52,
nrepcase=2, &end
&inp4 qx=-0.86678, &end
&inp5 vac=0.4, vxb=0.0, vxc=0.0, beac=3.0, bexb=1.0, bexc=1.0, &end

```

---

FIG. S8: Input files for the catalytic reaction of the models (from top) R7-y, R8-y, R9-y, R10-y, and R11-y. The different models are separated by horizontal lines.

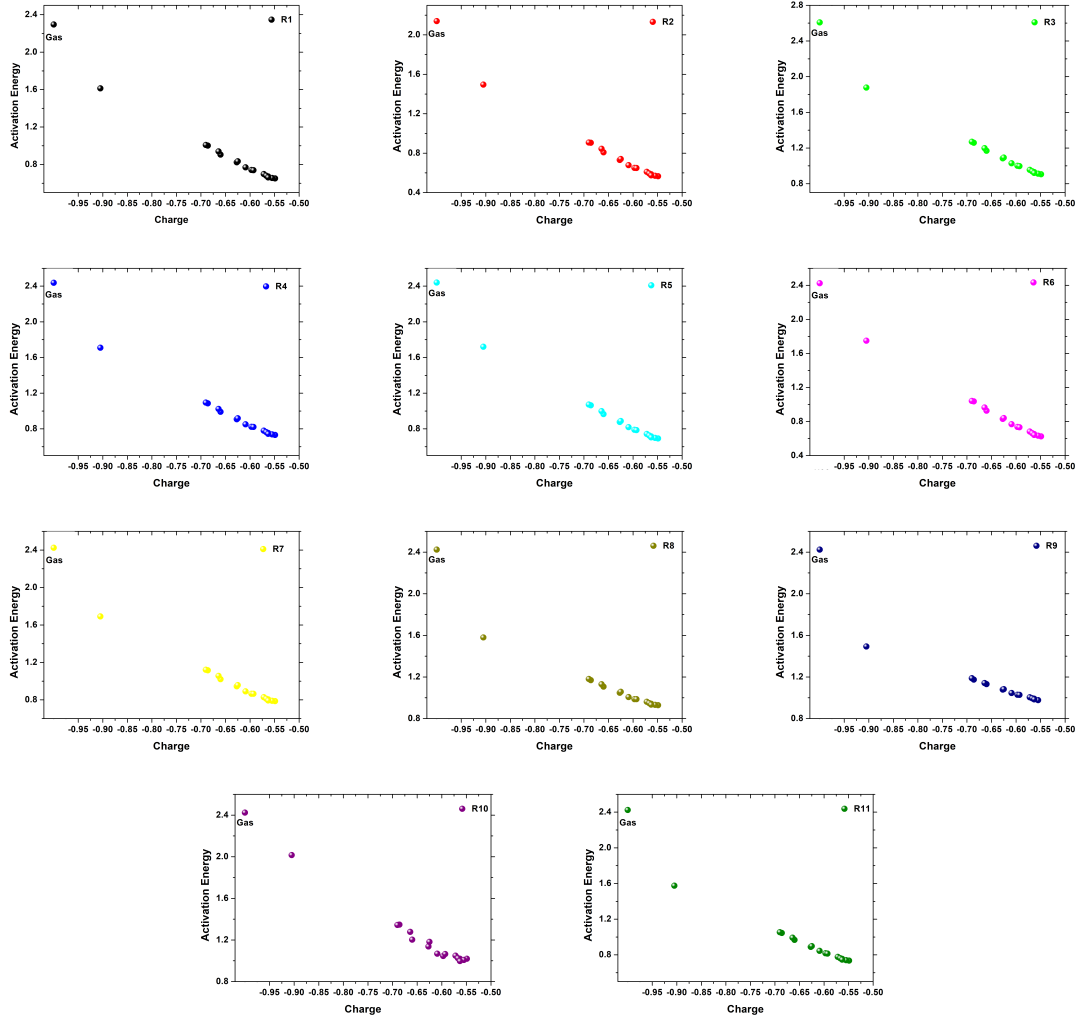

FIG. S9: Activation energy  $E_{a1}$  as a function of the initial atomic charge of the catalytic X atom for the reactions R1-y, R2-y, R3-y, R4-y, R5-y, R6-y, R7-y, R8-y, R9-y, R10-y, and R11-y from top left to bottom right. Only the polar surfaces are taken into account, i.e., the shapes 1y – 8y and 21y – 28y. The results marked ‘Gas’ are for the reaction in the gas phase without the catalyst.

|          |        |        |        |        |        |        |        |        |        |        |        |        |        |        |        |        |       |
|----------|--------|--------|--------|--------|--------|--------|--------|--------|--------|--------|--------|--------|--------|--------|--------|--------|-------|
| R1-y     |        |        |        |        |        |        |        |        |        |        |        |        |        |        |        |        |       |
| System:  | 1y     | 2y     | 3y     | 4y     | 5y     | 6y     | 7y     | 8y     | 21y    | 22y    | 23y    | 24y    | 25y    | 26y    | 27y    | 28y    | Gas   |
| $E_{a1}$ | 0.770  | 0.742  | 0.739  | 0.824  | 1.613  | 1.001  | 0.906  | 0.939  | 0.698  | 0.651  | 1.008  | 0.673  | 0.656  | 0.681  | 0.662  | 0.834  | 2.295 |
| $E_{a2}$ | 2.882  | 2.903  | 2.917  | 2.862  | 2.474  | 2.789  | 2.801  | 2.818  | 2.958  | 3.003  | 2.780  | 2.970  | 2.987  | 2.961  | 2.962  | 2.878  | 2.295 |
| System:  | 11y    | 12y    | 13y    | 14y    | 15y    | 16y    | 17y    | 18y    | 31y    | 32y    | 33y    | 34y    | 35y    | 36y    | 37y    | 38y    |       |
| $E_{a1}$ | 1.485  | 1.445  | 1.452  | 1.485  | 1.444  | 1.430  | 1.457  | 1.456  | 1.472  | 1.481  | 1.485  | 1.481  | 1.485  | 1.472  | 1.474  | 1.475  |       |
| $E_{a2}$ | 2.673  | 2.731  | 2.726  | 2.674  | 2.750  | 2.767  | 2.716  | 2.719  | 2.698  | 2.679  | 2.650  | 2.679  | 2.650  | 2.697  | 2.695  | 2.695  |       |
| R2-y     |        |        |        |        |        |        |        |        |        |        |        |        |        |        |        |        |       |
| System:  | 1y     | 2y     | 3y     | 4y     | 5y     | 6y     | 7y     | 8y     | 21y    | 22y    | 23y    | 24y    | 25y    | 26y    | 27y    | 28y    | Gas   |
| $E_{a1}$ | 0.678  | 0.651  | 0.649  | 0.731  | 1.496  | 0.905  | 0.809  | 0.844  | 0.610  | 0.566  | 0.908  | 0.586  | 0.571  | 0.594  | 0.575  | 0.741  | 2.140 |
| $E_{a2}$ | 3.019  | 3.041  | 3.056  | 2.997  | 2.585  | 2.921  | 2.932  | 2.952  | 3.099  | 3.146  | 2.909  | 3.112  | 3.130  | 3.102  | 3.104  | 3.014  | 2.368 |
| System:  | 11y    | 12y    | 13y    | 14y    | 15y    | 16y    | 17y    | 18y    | 31y    | 32y    | 33y    | 34y    | 35y    | 36y    | 37y    | 38y    |       |
| $E_{a1}$ | 1.376  | 1.342  | 1.348  | 1.376  | 1.341  | 1.329  | 1.352  | 1.352  | 1.365  | 1.372  | 1.375  | 1.372  | 1.375  | 1.365  | 1.367  | 1.368  |       |
| $E_{a2}$ | 2.791  | 2.857  | 2.851  | 2.793  | 2.875  | 2.895  | 2.840  | 2.843  | 2.820  | 2.799  | 2.768  | 2.799  | 2.768  | 2.819  | 2.816  | 2.816  |       |
| R3-y     |        |        |        |        |        |        |        |        |        |        |        |        |        |        |        |        |       |
| System:  | 1y     | 2y     | 3y     | 4y     | 5y     | 6y     | 7y     | 8y     | 21y    | 22y    | 23y    | 24y    | 25y    | 26y    | 27y    | 28y    | Gas   |
| $E_{a1}$ | 1.029  | 1.000  | 0.997  | 1.084  | 1.878  | 1.258  | 1.169  | 1.198  | 0.955  | 0.906  | 1.270  | 0.930  | 0.912  | 0.939  | 0.920  | 1.093  | 2.608 |
| $E_{a2}$ | 2.838  | 2.858  | 2.872  | 2.818  | 2.435  | 2.742  | 2.760  | 2.773  | 2.911  | 2.954  | 2.738  | 2.923  | 2.939  | 2.914  | 2.916  | 2.834  | 2.304 |
| System:  | 11y    | 12y    | 13y    | 14y    | 15y    | 16y    | 17y    | 18y    | 31y    | 32y    | 33y    | 34y    | 35y    | 36y    | 37y    | 38y    |       |
| $E_{a1}$ | 1.747  | 1.692  | 1.701  | 1.746  | 1.690  | 1.673  | 1.707  | 1.706  | 1.727  | 1.740  | 1.747  | 1.740  | 1.747  | 1.728  | 1.730  | 1.732  |       |
| $E_{a2}$ | 2.630  | 2.674  | 2.671  | 2.631  | 2.692  | 2.706  | 2.662  | 2.665  | 2.650  | 2.634  | 2.607  | 2.634  | 2.607  | 2.649  | 2.648  | 2.648  |       |
| R4-y     |        |        |        |        |        |        |        |        |        |        |        |        |        |        |        |        |       |
| System:  | 1y     | 2y     | 3y     | 4y     | 5y     | 6y     | 7y     | 8y     | 21y    | 22y    | 23y    | 24y    | 25y    | 26y    | 27y    | 28y    | Gas   |
| $E_{a1}$ | 0.851  | 0.823  | 0.821  | 0.907  | 1.709  | 1.085  | 0.991  | 1.023  | 0.780  | 0.732  | 1.094  | 0.754  | 0.737  | 0.763  | 0.744  | 0.918  | 2.438 |
| $E_{a2}$ | 2.260  | 2.281  | 2.295  | 2.239  | 1.858  | 2.165  | 2.179  | 2.196  | 2.337  | 2.381  | 2.158  | 2.348  | 2.365  | 2.339  | 2.341  | 2.257  | 1.723 |
| System:  | 11y    | 12y    | 13y    | 14y    | 15y    | 16y    | 17y    | 18y    | 31y    | 32y    | 33y    | 34y    | 35y    | 36y    | 37y    | 38y    |       |
| $E_{a1}$ | 1.576  | 1.531  | 1.539  | 1.576  | 1.530  | 1.515  | 1.544  | 1.543  | 1.561  | 1.570  | 1.576  | 1.570  | 1.576  | 1.561  | 1.563  | 1.565  |       |
| $E_{a2}$ | 2.051  | 2.107  | 2.102  | 2.052  | 2.125  | 2.142  | 2.092  | 2.095  | 2.075  | 2.057  | 2.029  | 2.057  | 2.029  | 2.075  | 2.073  | 2.073  |       |
| R5-y     |        |        |        |        |        |        |        |        |        |        |        |        |        |        |        |        |       |
| System:  | 1y     | 2y     | 3y     | 4y     | 5y     | 6y     | 7y     | 8y     | 21y    | 22y    | 23y    | 24y    | 25y    | 26y    | 27y    | 28y    | Gas   |
| $E_{a1}$ | 0.819  | 0.789  | 0.786  | 0.877  | 1.720  | 1.063  | 0.965  | 0.998  | 0.743  | 0.692  | 1.072  | 0.716  | 0.698  | 0.725  | 0.705  | 0.887  | 2.440 |
| $E_{a2}$ | 2.230  | 2.251  | 2.264  | 2.210  | 1.829  | 2.135  | 2.151  | 2.166  | 2.304  | 2.347  | 2.128  | 2.316  | 2.333  | 2.307  | 2.309  | 2.225  | 1.720 |
| System:  | 11y    | 12y    | 13y    | 14y    | 15y    | 16y    | 17y    | 18y    | 31y    | 32y    | 33y    | 34y    | 35y    | 36y    | 37y    | 38y    |       |
| $E_{a1}$ | 1.580  | 1.542  | 1.549  | 1.580  | 1.541  | 1.528  | 1.553  | 1.553  | 1.567  | 1.575  | 1.580  | 1.575  | 1.580  | 1.567  | 1.569  | 1.570  |       |
| $E_{a2}$ | 2.017  | 2.068  | 2.064  | 2.018  | 2.085  | 2.101  | 2.054  | 2.057  | 2.039  | 2.022  | 1.995  | 2.022  | 1.995  | 2.038  | 2.036  | 2.037  |       |
| R6-y     |        |        |        |        |        |        |        |        |        |        |        |        |        |        |        |        |       |
| System:  | 1y     | 2y     | 3y     | 4y     | 5y     | 6y     | 7y     | 8y     | 21y    | 22y    | 23y    | 24y    | 25y    | 26y    | 27y    | 28y    | Gas   |
| $V_X$    | -1.295 | -1.233 | -1.068 | -1.215 | -1.046 | -1.221 | -1.390 | -1.148 | -0.862 | -0.747 | -1.095 | -0.895 | -0.862 | -0.910 | -0.955 | -0.917 |       |
| $q_{0X}$ | -0.609 | -0.597 | -0.593 | -0.627 | -0.905 | -0.686 | -0.660 | -0.664 | -0.572 | -0.549 | -0.690 | -0.563 | -0.555 | -0.567 | -0.563 | -0.625 |       |
| $E_{a1}$ | 0.769  | 0.736  | 0.732  | 0.831  | 1.749  | 1.036  | 0.927  | 0.964  | 0.683  | 0.626  | 1.042  | 0.653  | 0.634  | 0.663  | 0.642  | 0.841  | 2.424 |
| $E_{a2}$ | 2.202  | 2.220  | 2.232  | 2.187  | 1.881  | 2.130  | 2.136  | 2.153  | 2.267  | 2.304  | 2.121  | 2.276  | 2.291  | 2.268  | 2.269  | 2.201  | 1.727 |
| System:  | 11y    | 12y    | 13y    | 14y    | 15y    | 16y    | 17y    | 18y    | 31y    | 32y    | 33y    | 34y    | 35y    | 36y    | 37y    | 38y    |       |
| $V_X$    | -0.064 | 0.779  | 0.687  | -0.048 | 0.913  | 1.119  | 0.571  | 0.600  | 0.296  | 0.050  | -0.278 | 0.050  | -0.278 | 0.289  | 0.254  | 0.240  |       |
| $q_{0X}$ | -0.853 | -0.853 | -0.852 | -0.853 | -0.852 | -0.852 | -0.853 | -0.852 | -0.853 | -0.853 | -0.853 | -0.853 | -0.853 | -0.853 | -0.853 | -0.853 |       |
| $E_{a1}$ | 1.589  | 1.561  | 1.565  | 1.588  | 1.559  | 1.548  | 1.569  | 1.569  | 1.580  | 1.586  | 1.590  | 1.586  | 1.590  | 1.580  | 1.581  | 1.582  |       |
| $E_{a2}$ | 2.048  | 2.109  | 2.103  | 2.049  | 2.125  | 2.143  | 2.093  | 2.096  | 2.074  | 2.055  | 2.028  | 2.055  | 2.028  | 2.073  | 2.071  | 2.071  |       |

TABLE S7: Calculated activation energies for models R1-y, R2-y, R3-y, R4-y, R5-y, and R6-y.

Also shown, for R6-y, are the atomic charges of the catalyst X atom as well as the potential at the

X site from the remaining part of the crystal. The results marked ‘Gas’ are for the reaction in the

gas phase without the catalyst

| R7-y     |       |       |       |       |       |       |       |       |       |        |       |       |       |       |       |       |       |
|----------|-------|-------|-------|-------|-------|-------|-------|-------|-------|--------|-------|-------|-------|-------|-------|-------|-------|
| System:  | 1y    | 2y    | 3y    | 4y    | 5y    | 6y    | 7y    | 8y    | 21y   | 22y    | 23y   | 24y   | 25y   | 26y   | 27y   | 28y   | Gas   |
| $E_{a1}$ | 0.891 | 0.865 | 0.865 | 0.944 | 1.691 | 1.115 | 1.021 | 1.056 | 0.829 | 0.787  | 1.121 | 0.805 | 0.790 | 0.812 | 0.793 | 0.957 | 2.424 |
| $E_{a2}$ | 2.299 | 2.320 | 2.337 | 2.280 | 1.903 | 2.206 | 2.219 | 2.238 | 2.382 | 2.427  | 2.202 | 2.392 | 2.410 | 2.384 | 2.384 | 2.302 | 1.727 |
| System:  | 11y   | 12y   | 13y   | 14y   | 15y   | 16y   | 17y   | 18y   | 31y   | 32y    | 33y   | 34y   | 35y   | 36y   | 37y   | 38y   |       |
| $E_{a1}$ | 1.553 | 1.485 | 1.495 | 1.552 | 1.481 | 1.458 | 1.504 | 1.503 | 1.529 | 1.545  | 1.556 | 1.545 | 1.556 | 1.529 | 1.532 | 1.535 |       |
| $E_{a2}$ | 2.110 | 2.162 | 2.159 | 2.111 | 2.182 | 2.197 | 2.149 | 2.152 | 2.134 | 2.116  | 2.084 | 2.116 | 2.084 | 2.133 | 2.131 | 2.132 |       |
| R8-y     |       |       |       |       |       |       |       |       |       |        |       |       |       |       |       |       |       |
| System:  | 1y    | 2y    | 3y    | 4y    | 5y    | 6y    | 7y    | 8y    | 21y   | 22y    | 23y   | 24y   | 25y   | 26y   | 27y   | 28y   | Gas   |
| $E_{a1}$ | 1.007 | 0.987 | 0.987 | 1.048 | 1.580 | 1.169 | 1.107 | 1.130 | 0.961 | 0.929  | 1.181 | 0.943 | 0.932 | 0.949 | 0.934 | 1.057 | 2.424 |
| $E_{a2}$ | 2.408 | 2.434 | 2.456 | 2.385 | 1.908 | 2.283 | 2.313 | 2.329 | 2.510 | 2.564  | 2.291 | 2.523 | 2.543 | 2.513 | 2.516 | 2.413 | 1.727 |
| System:  | 11y   | 12y   | 13y   | 14y   | 15y   | 16y   | 17y   | 18y   | 31y   | 32y    | 33y   | 34y   | 35y   | 36y   | 37y   | 38y   |       |
| $E_{a1}$ | 1.457 | 1.321 | 1.321 | 1.455 | 1.315 | 1.277 | 1.357 | 1.355 | 1.406 | 1.439  | 1.463 | 1.439 | 1.463 | 1.407 | 1.413 | 1.418 |       |
| $E_{a2}$ | 2.153 | 2.166 | 2.149 | 2.154 | 2.188 | 2.190 | 2.163 | 2.167 | 2.164 | 2.153  | 2.123 | 2.153 | 2.123 | 2.164 | 2.163 | 2.166 |       |
| R9-y     |       |       |       |       |       |       |       |       |       |        |       |       |       |       |       |       |       |
| System:  | 1y    | 2y    | 3y    | 4y    | 5y    | 6y    | 7y    | 8y    | 21y   | 22y    | 23y   | 24y   | 25y   | 26y   | 27y   | 28y   | Gas   |
| $E_{a1}$ | 1.046 | 1.029 | 1.028 | 1.078 | 1.493 | 1.174 | 1.131 | 1.142 | 1.005 | 17.699 | 1.188 | 0.991 | 0.977 | 0.995 | 0.985 | 1.083 | 2.424 |
| $E_{a2}$ | 2.462 | 2.490 | 2.513 | 2.436 | 1.892 | 2.317 | 2.358 | 2.369 | 2.572 | 19.350 | 2.331 | 2.586 | 2.602 | 2.576 | 2.580 | 2.465 | 1.727 |
| System:  | 11y   | 12y   | 13y   | 14y   | 15y   | 16y   | 17y   | 18y   | 31y   | 32y    | 33y   | 34y   | 35y   | 36y   | 37y   | 38y   |       |
| $E_{a1}$ | 1.374 | 1.194 | 1.220 | 1.371 | 1.188 | 1.140 | 1.240 | 1.236 | 1.305 | 1.349  | 1.382 | 1.349 | 1.382 | 1.295 | 1.301 | 1.321 |       |
| $E_{a2}$ | 2.153 | 2.127 | 2.138 | 2.153 | 2.149 | 2.140 | 2.135 | 2.136 | 2.150 | 2.148  | 2.122 | 2.148 | 2.122 | 2.139 | 2.139 | 2.156 |       |
| R10-y    |       |       |       |       |       |       |       |       |       |        |       |       |       |       |       |       |       |
| System:  | 1y    | 2y    | 3y    | 4y    | 5y    | 6y    | 7y    | 8y    | 21y   | 22y    | 23y   | 24y   | 25y   | 26y   | 27y   | 28y   | Gas   |
| $E_{a1}$ | 1.068 | 1.046 | 1.065 | 1.138 | 2.016 | 1.347 | 1.203 | 1.278 | 1.049 | 1.019  | 1.344 | 1.019 | 1.008 | 1.025 | 0.997 | 1.182 | 2.424 |
| $E_{a2}$ | 1.928 | 1.934 | 1.938 | 1.922 | 1.824 | 1.915 | 1.901 | 1.917 | 1.950 | 1.967  | 1.898 | 1.954 | 1.961 | 1.950 | 1.948 | 1.926 | 1.727 |
| System:  | 11y   | 12y   | 13y   | 14y   | 15y   | 16y   | 17y   | 18y   | 31y   | 32y    | 33y   | 34y   | 35y   | 36y   | 37y   | 38y   |       |
| $E_{a1}$ | 1.895 | 1.894 | 1.897 | 1.896 | 1.889 | 1.878 | 1.900 | 1.899 | 1.901 | 1.899  | 1.895 | 1.899 | 1.895 | 1.901 | 1.901 | 1.900 |       |
| $E_{a2}$ | 1.910 | 1.998 | 1.987 | 1.912 | 2.013 | 2.043 | 1.973 | 1.976 | 1.944 | 1.921  | 1.898 | 1.921 | 1.898 | 1.943 | 1.940 | 1.938 |       |
| R11-y    |       |       |       |       |       |       |       |       |       |        |       |       |       |       |       |       |       |
| System:  | 1y    | 2y    | 3y    | 4y    | 5y    | 6y    | 7y    | 8y    | 21y   | 22y    | 23y   | 24y   | 25y   | 26y   | 27y   | 28y   | Gas   |
| $E_{a1}$ | 0.844 | 0.817 | 0.814 | 0.889 | 1.575 | 1.045 | 0.967 | 0.992 | 0.777 | 0.735  | 1.054 | 0.755 | 0.740 | 0.762 | 0.746 | 0.898 | 2.424 |
| $E_{a2}$ | 2.391 | 2.417 | 2.436 | 2.362 | 1.863 | 2.261 | 2.292 | 2.305 | 2.488 | 2.542  | 2.263 | 2.503 | 2.523 | 2.492 | 2.496 | 2.387 | 1.727 |
| System:  | 11y   | 12y   | 13y   | 14y   | 15y   | 16y   | 17y   | 18y   | 31y   | 32y    | 33y   | 34y   | 35y   | 36y   | 37y   | 38y   |       |
| $E_{a1}$ | 1.446 | 1.368 | 1.380 | 1.446 | 1.365 | 1.343 | 1.388 | 1.387 | 1.417 | 1.436  | 1.449 | 1.436 | 1.449 | 1.418 | 1.421 | 1.424 |       |
| $E_{a2}$ | 2.095 | 2.114 | 2.116 | 2.097 | 2.133 | 2.138 | 2.109 | 2.112 | 2.107 | 2.097  | 2.070 | 2.097 | 2.070 | 2.106 | 2.105 | 2.108 |       |

TABLE S8: Calculated activation energies for no-Z models R7-y, R8-y, R9-y, R10-y, and R11-y. The results marked ‘Gas’ are for the reaction in the gas phase without the catalyst.

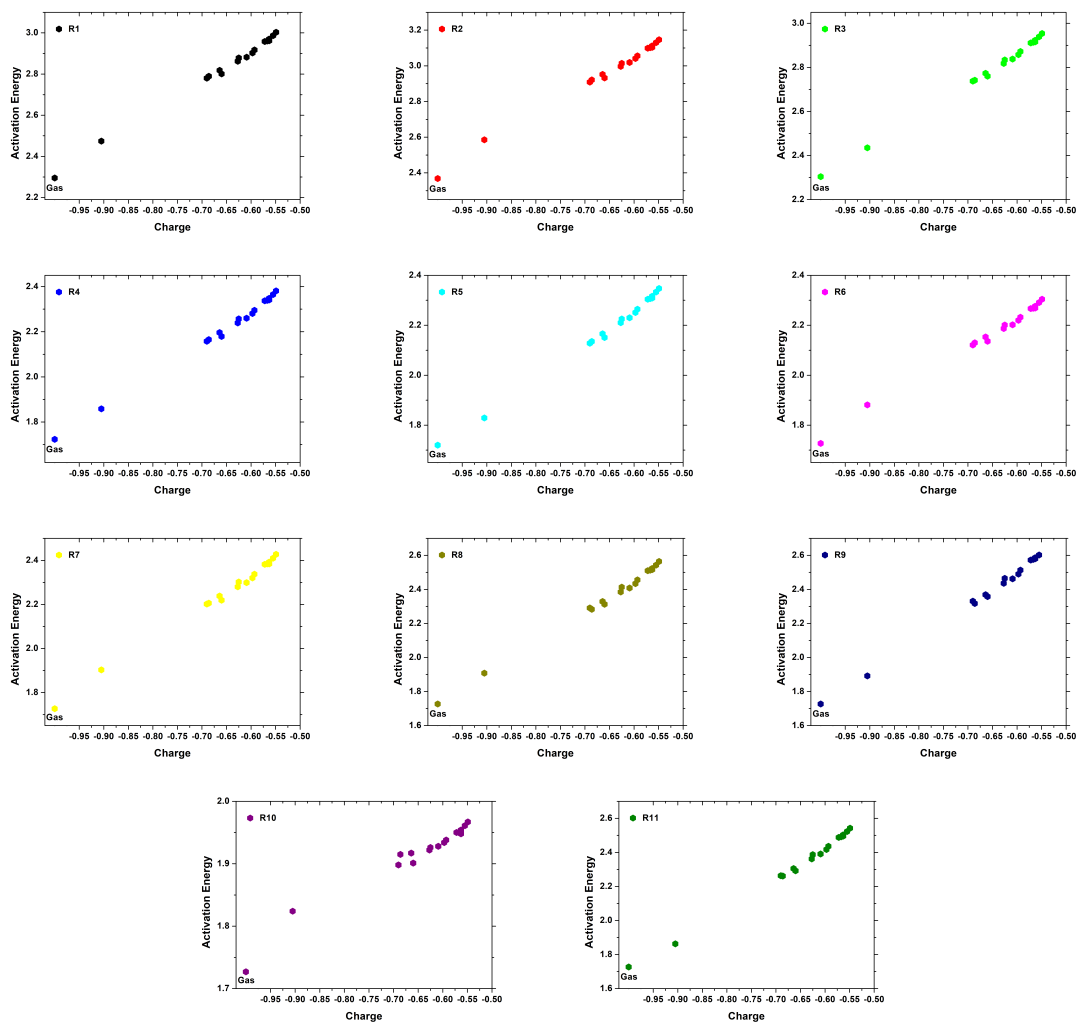

FIG. S10: As Fig. S9, but the activation energy  $E_{a2}$ . The results marked ‘Gas’ are for the reaction in the gas phase without the catalyst.

---

```

&inp3 epsx=-5.5, epsa=-2.8, epsb=-3.2, epsc=-2.60,
txa0=3.0, tab0=5.0, tbc0=5.1, alxa=0.4, alab=0.45, albc=0.5,
dxa0=2.0, dab0=2.1, dbc0=2.15, bexa=4.5, beab=1.5, bebc=1.52,
nrepcase=2, &end
&inp4 qx=-0.72058, &end
&inp5 vac=0.4, vxb=0.0, vxc=0.0, beac=3.0, bexb=1.0, bexc=1.0, &end
-----
&inp3 epsx=-5.5, epsa=-2.8, epsb=-3.2, epsc=-2.60,
txa0=3.0, tab0=5.0, tbc0=5.1, alxa=0.4, alab=0.45, albc=0.5,
dxa0=2.0, dab0=2.1, dbc0=2.15, bexa=4.5, beab=1.5, bebc=1.52,
nrepcase=2, &end
&inp4 qx=-0.86381, &end
&inp5 vac=0.4, vxb=0.0, vxc=0.0, beac=3.0, bexb=1.0, bexc=1.0, &end
-----
&inp3 epsx=-5.5, epsa=-2.8, epsb=-3.2, epsc=-2.60,
txa0=3.0, tab0=5.0, tbc0=5.1, alxa=0.4, alab=0.45, albc=0.5,
dxa0=2.0, dab0=2.1, dbc0=2.15, bexa=4.5, beab=1.5, bebc=1.52,
nrepcase=2, &end
&inp4 qx=-0.39991, &end
&inp5 vac=0.4, vxb=0.0, vxc=0.0, beac=3.0, bexb=1.0, bexc=1.0, &end

```

---

FIG. S11: Input files for the models (from top) R6-x, R6-z, and R6-w used for the catalytic reaction. The different models are separated by horizontal lines.



| R6-x     |        |        |        |        |        |        |        |        |        |        |        |        |        |        |        |        |       |
|----------|--------|--------|--------|--------|--------|--------|--------|--------|--------|--------|--------|--------|--------|--------|--------|--------|-------|
| System:  | 21x    | 22x    | 23x    | 24x    | 25x    | 26x    | 27x    | 28x    | 31x    | 32x    | 33x    | 34x    | 35x    | 36x    | 37x    | 38x    | Gas   |
| $V_X$    | -0.421 | -0.374 | -0.526 | -0.450 | -0.466 | -0.457 | -0.458 | -0.471 | 0.254  | 0.176  | 0.047  | 0.176  | 0.047  | 0.241  | 0.226  | 0.246  |       |
| $q_{0X}$ | -0.507 | -0.506 | -0.534 | -0.507 | -0.509 | -0.507 | -0.504 | -0.515 | -0.699 | -0.699 | -0.699 | -0.699 | -0.699 | -0.699 | -0.699 | -0.699 |       |
| $E_{a1}$ | 0.541  | 0.545  | 0.609  | 0.540  | 0.548  | 0.535  | 0.526  | 0.558  | 1.150  | 1.146  | 1.143  | 1.146  | 1.143  | 1.149  | 1.148  | 1.150  | 2.424 |
| $E_{a2}$ | 2.382  | 2.390  | 2.345  | 2.381  | 2.380  | 2.378  | 2.380  | 2.367  | 2.233  | 2.225  | 2.214  | 2.225  | 2.214  | 2.232  | 2.230  | 2.231  | 1.727 |
| R6-z     |        |        |        |        |        |        |        |        |        |        |        |        |        |        |        |        |       |
| System:  | 1z     | 2z     | 3z     | 4z     | 5z     | 6z     | 7z     | 8z     | 21z    | 22z    | 23z    | 24z    | 25z    | 26z    | 27z    | 28z    | Gas   |
| $V_X$    | -1.401 | -1.305 | -1.153 | -1.301 | -1.580 | -1.313 | -1.582 | -1.243 | -0.883 | -0.686 | -1.249 | -0.926 | -0.854 | -0.958 | -0.988 | -1.022 |       |
| $q_{0X}$ | -0.530 | -0.525 | -0.533 | -0.552 | -0.691 | -0.570 | -0.572 | -0.562 | -0.513 | -0.484 | -0.611 | -0.498 | -0.477 | -0.504 | -0.496 | -0.563 |       |
| $E_{a1}$ | 0.475  | 0.468  | 0.504  | 0.555  | 1.030  | 0.643  | 0.591  | 0.605  | 0.464  | 0.402  | 0.743  | 0.416  | 0.364  | 0.428  | 0.397  | 0.599  | 2.424 |
| $E_{a2}$ | 2.266  | 2.278  | 2.272  | 2.245  | 2.090  | 2.253  | 2.200  | 2.250  | 2.308  | 2.360  | 2.172  | 2.325  | 2.359  | 2.314  | 2.319  | 2.235  | 1.727 |
| System:  | 11z    | 12z    | 13z    | 14z    | 15z    | 16z    | 17z    | 18z    | 31z    | 32z    | 33z    | 34z    | 35z    | 36z    | 37z    | 38z    |       |
| $V_X$    | 0.213  | 1.065  | 1.019  | 0.267  | 1.212  | 1.628  | 0.897  | 0.774  | 0.605  | 0.317  | -0.111 | 0.317  | -0.111 | 0.593  | 0.525  | 0.547  |       |
| $q_{0X}$ | -0.872 | -0.872 | -0.872 | -0.872 | -0.872 | -0.872 | -0.872 | -0.872 | -0.872 | -0.873 | -0.873 | -0.873 | -0.873 | -0.872 | -0.872 | -0.872 |       |
| $E_{a1}$ | 1.651  | 1.613  | 1.617  | 1.650  | 1.610  | 1.584  | 1.623  | 1.628  | 1.637  | 1.646  | 1.654  | 1.646  | 1.654  | 1.638  | 1.640  | 1.641  |       |
| $E_{a2}$ | 2.025  | 2.080  | 2.079  | 2.029  | 2.097  | 2.134  | 2.070  | 2.060  | 2.052  | 2.030  | 1.996  | 2.030  | 1.996  | 2.051  | 2.046  | 2.049  |       |
| R6-w     |        |        |        |        |        |        |        |        |        |        |        |        |        |        |        |        |       |
| System:  | 1w     | 2w     | 3w     | 4w     | 5w     | 6w     | 7w     | 8w     | 21w    | 22w    | 23w    | 24w    | 25w    | 26w    | 27w    | 28w    | Gas   |
| $V_X$    | -0.138 | -0.117 | -0.087 | -0.115 | -0.087 | -0.069 | -0.128 | -0.126 | -0.059 | -0.065 | -0.097 | -0.079 | -0.102 | -0.062 | -0.069 | -0.092 |       |
| $q_{0X}$ | -0.301 | -0.300 | -0.299 | -0.300 | -0.310 | -0.305 | -0.301 | -0.302 | -0.297 | -0.298 | -0.299 | -0.298 | -0.300 | -0.297 | -0.296 | -0.298 |       |
| $E_{a1}$ | 0.046  | 0.049  | 0.048  | 0.047  | 0.051  | 0.044  | 0.040  | 0.042  | 0.045  | 0.046  | 0.048  | 0.050  | 0.103  | 0.080  | 0.045  | 0.057  | 2.424 |
| $E_{a2}$ | 2.688  | 2.691  | 2.696  | 2.694  | 2.705  | 2.702  | 2.689  | 2.693  | 2.697  | 2.698  | 2.694  | 2.695  | 2.694  | 2.696  | 2.695  | 2.693  | 1.727 |
| System:  | 11w    | 12w    | 13w    | 14w    | 15w    | 16w    | 17w    | 18w    | 31w    | 32w    | 33w    | 34w    | 35w    | 36w    | 37w    | 38w    |       |
| $V_X$    | 0.190  | 0.208  | 0.158  | 0.190  | 0.173  | 0.223  | 0.156  | 0.159  | 0.183  | 0.191  | 0.143  | 0.191  | 0.143  | 0.177  | 0.185  | 0.218  |       |
| $q_{0X}$ | -0.396 | -0.401 | -0.400 | -0.396 | -0.400 | -0.398 | -0.399 | -0.400 | -0.396 | -0.396 | -0.398 | -0.396 | -0.398 | -0.397 | -0.396 | -0.397 |       |
| $E_{a1}$ | 0.351  | 0.382  | 0.368  | 0.353  | 0.374  | 0.380  | 0.362  | 0.368  | 0.357  | 0.356  | 0.355  | 0.356  | 0.355  | 0.357  | 0.357  | 0.362  |       |
| $E_{a2}$ | 2.598  | 2.607  | 2.600  | 2.600  | 2.603  | 2.615  | 2.599  | 2.600  | 2.601  | 2.600  | 2.595  | 2.600  | 2.595  | 2.599  | 2.601  | 2.603  |       |

TABLE S9: Calculated activation energies for the models R6-x, R6-z, and R6-w. Also shown are the initial atomic charge of the catalytic X atom as well as the potential at the same X site from the remainder of the crystal. The results marked ‘Gas’ are for the reaction in the gas phase without the catalyst.

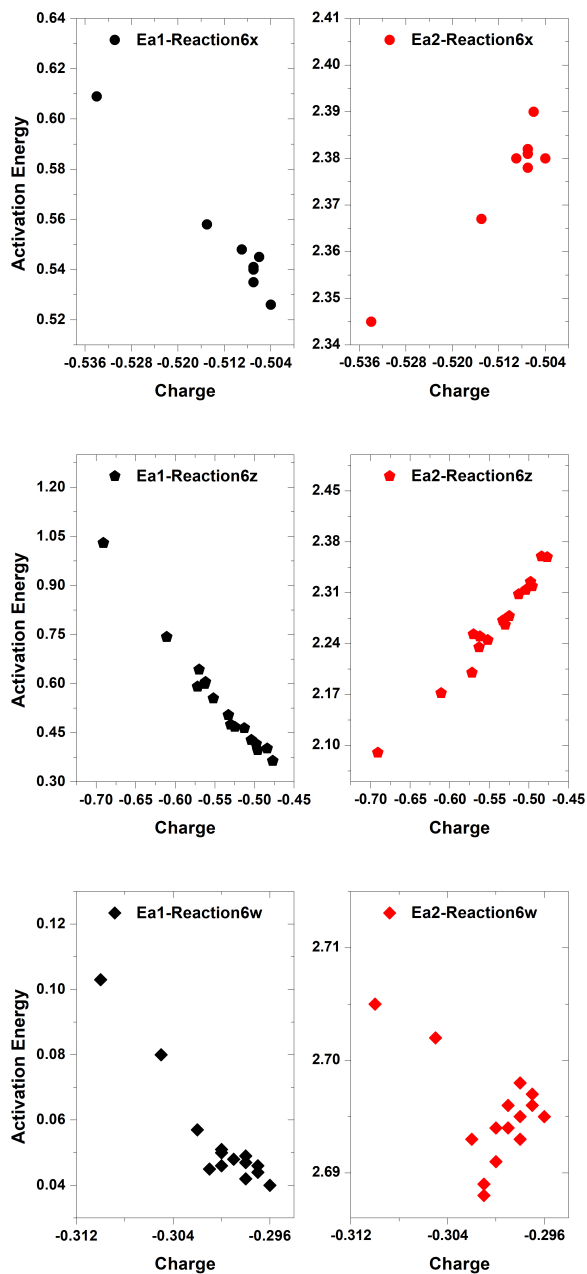

FIG. S12: Activation energies  $E_{a1}$  and  $E_{a2}$  as a function of the initial atomic charge of the catalytic X atom for the reactions (from top to bottom) R6-x, R6-z, and R6-w. Only the polar surfaces are taken into account, i.e., the shapes 1 – 8 and 21 – 28.

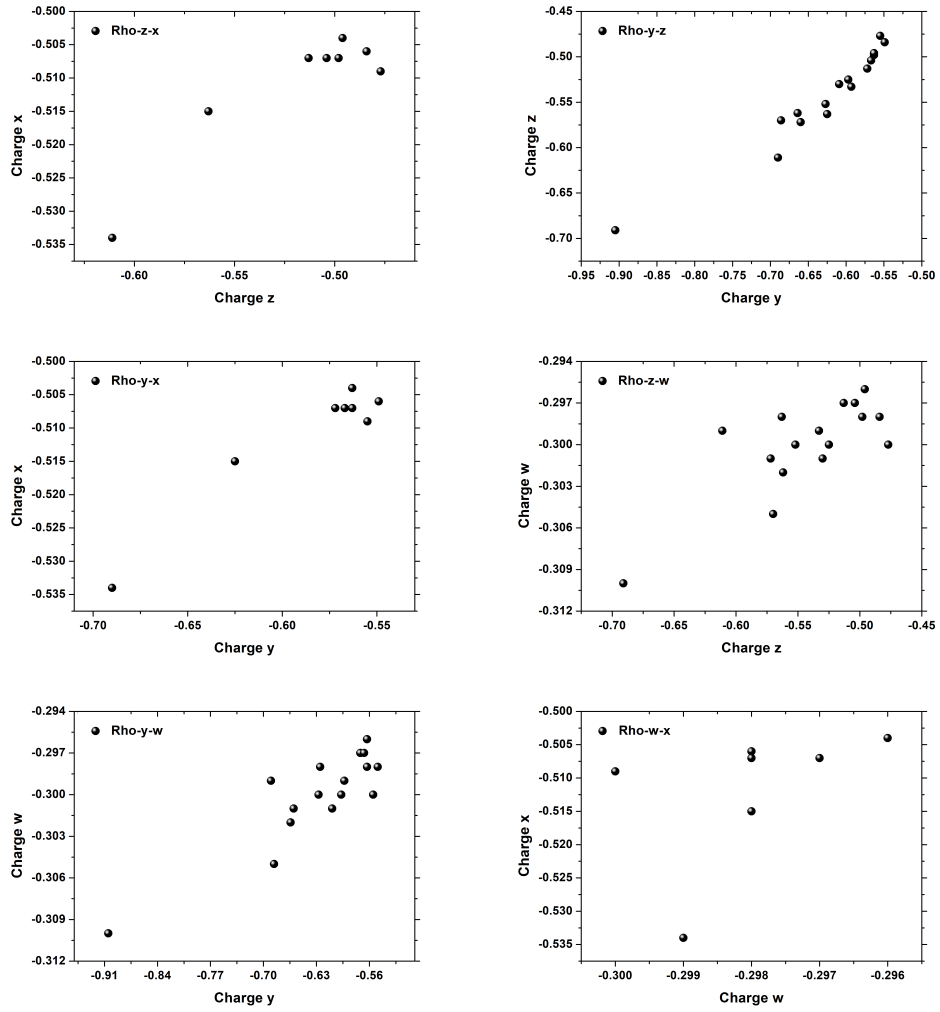

FIG. S13: Initial atomic charges for catalytic X atoms at the same position of the same surface and shape for different pairs of model catalysts. The panels are labelled Rho-z-x, Rho-y-z, etc. to denote the model pairs (z,x), (y-z), etc. Only the polar surfaces are taken into account, i.e., the shapes 1 – 8 and 21 – 28.
